# Supplementary material for: Independent validation and regulatory agency approval for high rate algal ponds to treat wastewater from rural communities
Source: Royal Society of Chemistry journal article supplement (doi:10.1039/c7ew00228a), 2017-11-08
Supplement: c7ew00228a1.pdf [file c7ew00228a1.pdf]

**Supplementary material 1.** Results of Shapiro–Wilk test for normality on concentration and  $\log_{10}$  reduction values for *Escherichia coli*, F-RNA bacteriophage and aerobic spore-forming bacteria in the inlet, HRAP1, HRAP2 and in series measured by either Australian Water Quality Centre or Flinders University of South Australia at the HRAP system in Kingston on Murray, SA between 1 August and 10 October 2013. Results of Shapiro–Wilk test for normality on inlet, HRAP1 and HRAP2 BOD<sub>5</sub> concentration measured by Flinders University of South Australia concurrently is also included.

| Samples                                                             | Statistic | df | Significance |
|---------------------------------------------------------------------|-----------|----|--------------|
| FUSA inlet <i>Escherichia coli</i> concentration                    | .938      | 6  | .644         |
| FUSA inlet F-RNA bacteriophage concentration                        | .820      | 6  | .089         |
| AWQC inlet <i>Escherichia coli</i> concentration                    | .875      | 6  | .246         |
| AWQC inlet F-RNA bacteriophage concentration                        | .886      | 6  | .297         |
| AWQC inlet aerobic spore-forming bacteria concentration             | .956      | 6  | .789         |
| FUSA HRAP1 <i>Escherichia coli</i> concentration                    | .929      | 20 | .150         |
| FUSA HRAP2 <i>Escherichia coli</i> concentration                    | .980      | 20 | .939         |
| FUSA HRAP1 F-RNA bacteriophage concentration                        | .977      | 20 | .885         |
| FUSA HRAP2 F-RNA bacteriophage concentration                        | .965      | 20 | .654         |
| FUSA HRAP1 <i>Escherichia coli</i> $\log_{10}$ reduction values     | .927      | 20 | .138         |
| FUSA HRAP2 <i>Escherichia coli</i> $\log_{10}$ reduction values     | .941      | 20 | .254         |
| FUSA in series <i>Escherichia coli</i> $\log_{10}$ reduction values | .926      | 20 | .130         |
| FUSA HRAP1 F-RNA bacteriophage $\log_{10}$ reduction values         | .938      | 20 | .218         |
| FUSA HRAP2 F-RNA bacteriophage $\log_{10}$ reduction values         | .933      | 20 | .178         |
| FUSA in series F-RNA bacteriophage $\log_{10}$ reduction values     | .973      | 20 | .823         |
| AWQC HRAP1 <i>Escherichia coli</i> concentration                    | .942      | 20 | .258         |
| AWQC HRAP2 <i>Escherichia coli</i> concentration                    | .914      | 20 | .076         |
| AWQC HRAP1 F-RNA bacteriophage concentration                        | .950      | 20 | .362         |
| AWQC HRAP2 F-RNA bacteriophage concentration                        | .899      | 20 | .040         |
| AWQC HRAP1 <i>Escherichia coli</i> $\log_{10}$ reduction values     | .935      | 20 | .193         |
| AWQC HRAP2 <i>Escherichia coli</i> $\log_{10}$ reduction values     | .826      | 20 | .002         |
| AWQC in series <i>Escherichia coli</i> $\log_{10}$ reduction values | .924      | 20 | .119         |
| AWQC HRAP1 F-RNA bacteriophage $\log_{10}$ reduction values         | .941      | 20 | .253         |
| AWQC HRAP2 F-RNA bacteriophage $\log_{10}$ reduction values         | .835      | 20 | .003         |
| AWQC in series F-RNA bacteriophage $\log_{10}$ reduction values     | .821      | 20 | .002         |
| FUSA inlet BOD <sub>5</sub> concentration                           | .924      | 6  | .534         |
| FUSA HRAP1 BOD <sub>5</sub> concentration                           | .755      | 20 | .000         |
| FUSA HRAP2 BOD <sub>5</sub> concentration                           | .842      | 20 | .004         |
